1 **JARID2 facilitates transcriptional reprogramming in glioblastoma in response to standard**  
2 **treatment**

3 Nora Rippaus<sup>1</sup>, Alexander F-Bruns<sup>1,‡</sup>, Georgette Tanner<sup>1</sup>, Claire Taylor<sup>1</sup>, Alastair Droop<sup>2,‡</sup>, Anke  
4 Brüning-Richardson<sup>1,‡</sup>, Matthew A. Care<sup>2</sup>, Joseph Wilkinson<sup>1</sup>, Michael D. Jenkinson<sup>3,4</sup>, Andrew  
5 Brodbelt<sup>3</sup>, Aruna Chakrabarty<sup>5</sup>, Azzam Ismail<sup>5</sup>, Susan Short<sup>1,5</sup> and Lucy F. Stead<sup>1,§</sup>

6

7 <sup>1</sup>Leeds Institute of Medical Research at St James's, University of Leeds, Leeds, LS9 7TF, UK;

8 <sup>2</sup>Leeds Institute of Data Analytics, University of Leeds, LS2 9JT, UK; <sup>3</sup>Walton Centre NHS Trust,

9 Liverpool, L9 7LJ, UK; <sup>4</sup>Institute of Translational Medicine, University of Liverpool, L9 7LJ, UK;

10 <sup>5</sup>Leeds Teaching Hospitals NHS Trust, St James's University Hospital, Leeds, LS9 7TF, UK

11

12 <sup>§</sup>To whom correspondence should be addressed. Tel: +44 113 343 8410 Email:

13 [l.f.stead@leeds.ac.uk](mailto:l.f.stead@leeds.ac.uk).

14 <sup>‡</sup>Current address for AFB is Leeds Institute of Cardiovascular and Metabolic Medicine, University  
15 of Leeds, Leeds, LS2 9JT, UK, for AD is Wellcome Sanger Institute, Wellcome Genome Campus,  
16 Cambridge, CB10 1SA, UK and for ABR is University of Huddersfield, Queensgate, Huddersfield  
17 HD1 3DH, UK.

18

19

20

21 **ABSTRACT**

22 **Background:** Glioblastoma (GBM) is a fatal and incurable brain cancer with a dismal prognosis. In  
23 order to impact on this disease, we need to understand how infiltrating, non resectable tumour  
24 cells resist chemoradiation and facilitate disease recurrence. To this end, we generated or  
25 acquired bulk tumour RNA sequencing data from 45 paired primary and locally recurrent GBM  
26 tumours (split into original and validation cohorts) from patients that received standard treatment.  
27 We also generated DNA methylation profiles for 9 pairs and sequenced RNA from single cells  
28 isolated from a patient derived GBM spheroid model at different timepoints following *in vitro*  
29 chemoradiation.

30 **Results:** We have identified a set of genes with Jumonji and AT-Rich Interacting Domain 2  
31 (JARID2) binding sites in their promoters that are universally dysregulated in post-standard  
32 treatment recurrent GBMs compared to the primary tumour. The direction of dysregulation is  
33 patient-dependent and not associated with differential promoter DNA methylation. Our *in vitro*  
34 experiments suggest that this dysregulation occurs dynamically following treatment as opposed to  
35 resulting from selection of cells with specific expression profiles.

36 **Conclusion:** JARID2 is an accessory protein to a chromatin remodeling complex, responsible for  
37 histone modifications observed during cell state transitions in both normal brain and GBM. We  
38 propose that JARID2 facilitates GBM recurrence following treatment by indirect transcriptional  
39 reprogramming of surviving cells in whichever manner is needed to reproduce the phenotypic  
40 heterogeneity required for tumour regrowth *in vivo*. The mechanism of this reprogramming may  
41 present a therapeutic vulnerability for more effective treatment of GBM.

42

43 **Keywords:** Glioblastoma; High grade glioma; Recurrence; RNAseq; Cell plasticity; Chromatin  
44 remodelling; Longitudinal; Treatment resistance; Tumour adaption; Transcriptional reprogramming

45

46

## 47 **BACKGROUND**

48 Glioblastoma (GBM) is arguably one of the most challenging cancers to treat and is associated  
49 with very poor prognosis. This is in part because GBM cells infiltrate the surrounding normal brain  
50 making complete surgical removal impossible and, despite subsequent chemoradiation, the  
51 remaining cells resist treatment and facilitate tumour regrowth in almost 100% of cases. If we ever  
52 hope to more effectively treat GBM we must understand how and why unresected cells resist  
53 treatment and form a recurrent tumour. To this end, we and others have focused our attention on  
54 molecular profiling of paired primary and recurrent GBM tumours to specifically identify features  
55 which are expanded post-treatment and may offer insight into the properties of cells which survive,  
56 or the mechanisms that enable their continued proliferation<sup>[1-5]</sup>. As part of the Glioma Longitudinal  
57 AnalySiS consortium, we have analysed the genomes of more than 200 paired gliomas and  
58 determined that there is no clear evidence for therapy-driven selection of cells bearing specific  
59 resistance-conferring mutations (manuscript under review) in agreement with the work of Körber et  
60 al.<sup>[3, 6]</sup>. We have, therefore, focused our continued efforts herein on transcriptional features and the  
61 possibility of therapy-driven selection of GBM cell populations defined by expression profiles.  
62 Transcriptional heterogeneity is evident in GBM: expression profiles align with  
63 neurodevelopmental-like hierarchies that span genomic subclones and are functionally distinct,  
64 including with respect to treatment sensitivity *in vitro*<sup>[7, 8]</sup>. We generated or acquired RNAseq data  
65 from paired primary and recurrent GBMs from a cohort of 23 patients (our original cohort) that  
66 underwent standard treatment (debulking surgery followed by chemoradiation with the alkylating  
67 drug temozolomide) and had a local recurrence. We then acquired data from an additional 22 such  
68 patients (our validation cohort). Our analyses of these data, and of DNA methylation profiles from 9  
69 pairs, consistently highlight the likely role of a Polycomb Repressive Complex 2 (PRC2) accessory  
70 protein called JARID2 (Jumonji and AT-Rich Interacting Domain 2) in the transcriptional changes  
71 observed after treatment in GBM, via histone modifications and chromatin remodeling. However,  
72 the direction of fold change is not consistent across patients. We then performed single cell  
73 RNAseq on a patient derived GBM model at different time points following administration of  
74 clinically relevant doses of chemoradiation *in vitro* and found that JARID2 associated  
75 transcriptional changes occur dynamically after treatment as opposed to resulting from selection of

76 cells with a specific expression profile. JARID2's interaction with PRC2 is fundamental to  
77 specifying neurodevelopmental cell lineages in response to environmental cues, and PRC2 has  
78 been shown to be necessary for determining GBM cell phenotypes based on tumour  
79 microenvironmental pressures, though the role of JARID2 in this has never been investigated<sup>[9-12]</sup>.  
80 We propose that GBM recurrence results from JARID2-associated transcriptional reprogramming,  
81 via PRC2, of unresected cells in whichever direction enables recapitulation of the transcriptional  
82 heterogeneity needed for continued tumour growth *in vivo*<sup>[13]</sup>. Therapeutic targeting of the  
83 mechanism of such reprogramming may constitute a more effective treatment strategy than  
84 targeting of the cell types that lie either side of the interconversions.

85

## 86 **RESULTS**

### 87 **Differential expression indicates a therapy-driven shift in neurodevelopmental genes**

88 Genes that were differentially expressed (DE) in the recurrent versus primary GBMs in our original  
89 cohort (Supp.Table.1) were significantly enriched for those involved in cell development and  
90 lineage determination, specifically in relation to neurodevelopment (Fig.1a and Supp.Table.2).  
91 Brain cell fate is orchestrated by the combined actions of transcription factors (TFs) and chromatin  
92 remodeling complexes, both of which have been implicated in establishing functionally  
93 heterogeneous transcriptional hierarchies in gliomas<sup>[14, 15]</sup>. We therefore reasoned that specific  
94 DNA-binding factors may coordinately regulate the genes we observe to be altered after treatment,  
95 potentially highlighting certain cell types that survive. Candidate master transcriptional regulators  
96 can be identified from expression data via gene set enrichment analysis (GSEA). However, we  
97 found that many neurodevelopmental TFs were missing from publicly available gene sets, so we  
98 first developed a more comprehensive DNA-binding factor gene set using ChIPseq data from the  
99 Gene Transcription Regulation Database (see Methods)<sup>[16]</sup>.

100 **Genes with JARID2 binding sites in their promoters (JBSgenes) are consistently and**  
101 **significantly dysregulated in recurrent versus primary GBMs and stratify patients into two**  
102 **response subtypes**

103 We performed per-patient GSEA, using our novel gene set, with genes pre-ranked by the  
 104 magnitude of fold change in expression between the primary and recurrent tumour. Genes with a  
 105 Jumonji and AT-Rich Interacting Domain 2 (JARID2) binding site in their promoters (JBSgenes)  
 106 were the most significantly, consistently and highly enriched within the genes changed after  
 107 therapy across patients: the normalized enrichment score (NES) for JARID2 was significant in all  
 108 patients (FDR<0.05) and gave the highest score in 91% (n=21/23) (Fig.1b). To determine whether  
 109 JBSgenes were consistently up-regulated or down-regulated after treatment, we repeated the  
 110 analysis including the direction of fold change in the gene ranking. We found that the JBSgenes  
 111 were altered in a consistent direction per patient but across patients the direction varied: in 30%  
 112 (n=7/23) the JARID2 enrichment was being driven by down-regulation of JBSgenes (hereon  
 113 referred to as D response subtype) and in the remaining 70% (n=16/23) it through up-regulation (U  
 114 response subtype) (Fig.1c).

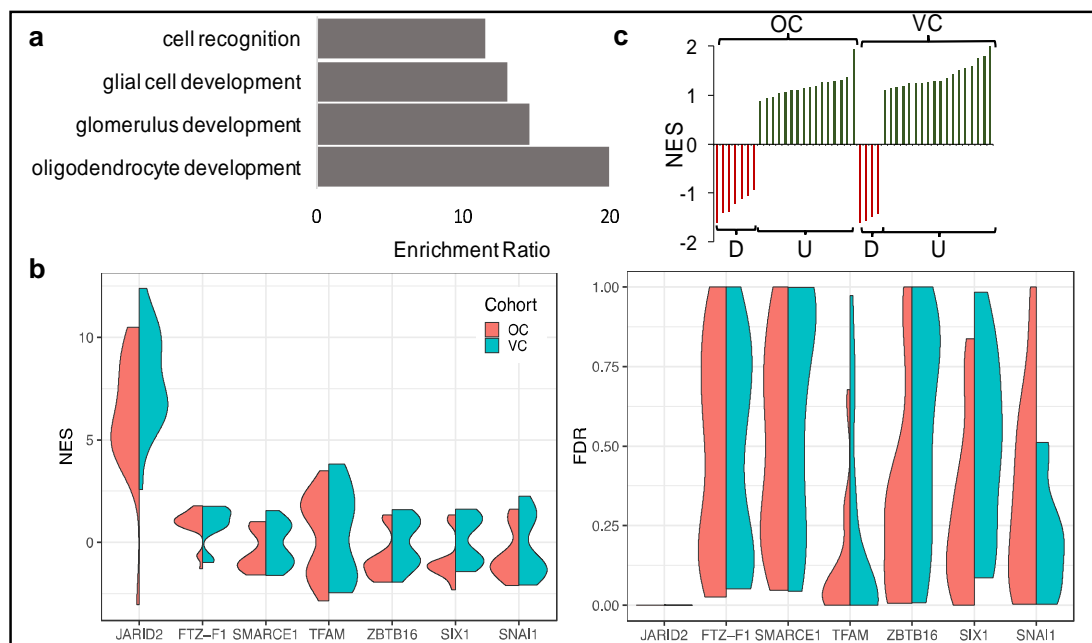

115

116 **Fig.1a)** Biological processes enriched in the genes differentially expressed between matched  
 117 primary and recurrent GBMs (enrichment ratio and term count>10,  $p<0.0005$ ); **b)** Per-patient  
 118 normalised enrichment scores (NES, left plot) and false discovery rates (FDR, right plot) for the  
 119 top-scoring promoter-binding factors associated with gene expression changes in recurrent vs  
 120 primary GBMs, highlighting the significance of JARID2; **c)** The NES for JARID2 for each patient (x-  
 121 axis) when direction of fold change is taken into account, shows that there are two response

122 subtypes based on whether genes are up (U) or down (D) regulated. OC: original cohort. VC:  
 123 validation cohort.

124

125 We acquired data from an additional 22 paired primary and recurrent GBMs from patients who  
 126 underwent standard treatment and who had a local recurrence (the validation cohort) which  
 127 corroborated our findings (Figs.1b and c) with a similar ratio of D response subtype (n=4/22) and U  
 128 response subtype (n=18/22) patients (Fisher's exact test,  $p=0.52$ )<sup>[5]</sup>.

129

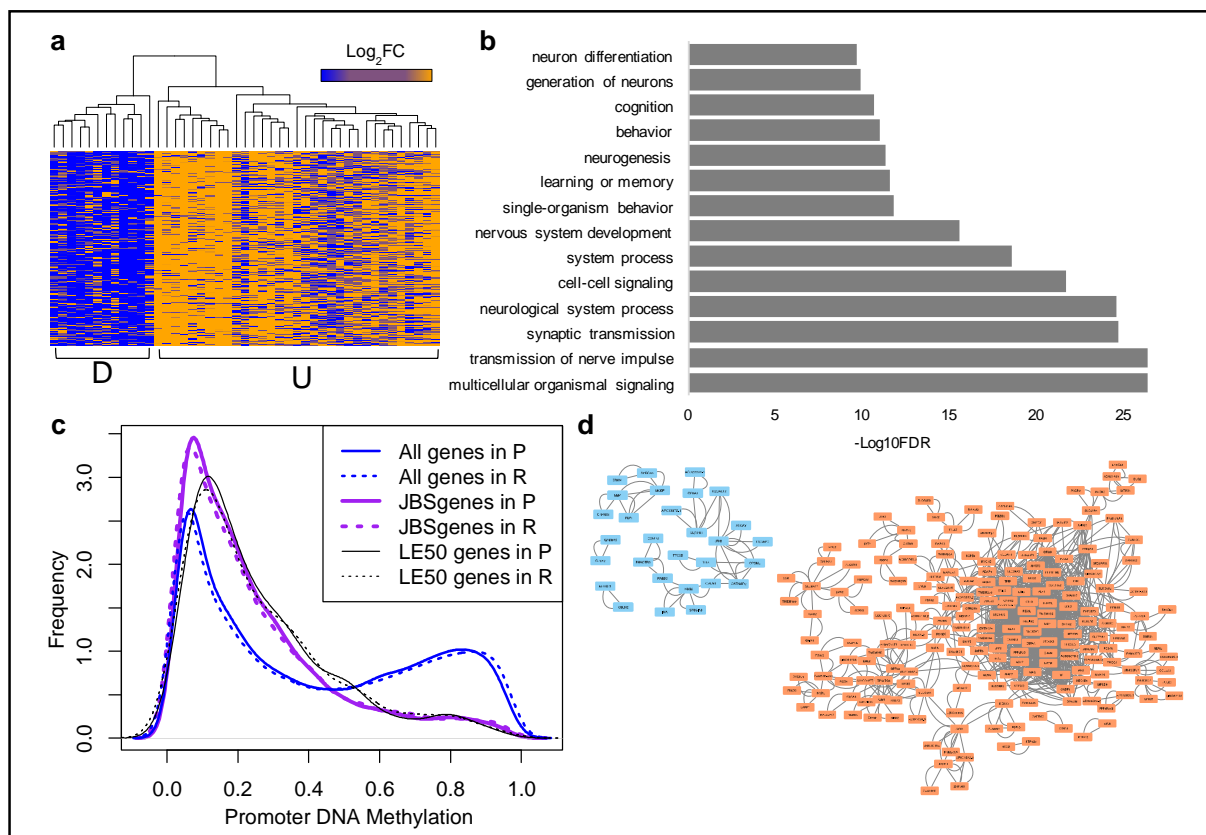

130  
 131

132 **Fig.2a)** Heatmap of fold change in expression after treatment per patient (columns) for the genes  
 133 in the leading edge of the JARID2 GSEA results in more than 50% of patients across both cohorts  
 134 (LE50 genes, rows). These same genes are upregulated in U response subtype patients as are  
 135 downregulated in D response subtype patients; **b)** The biological processes (with <2000 terms)  
 136 most enriched in LE50 genes; **c)** The distribution of average promoter DNA methylation for all  
 137 genes, JARID2 binding site (JBS)genes and LE50 genes in primary (P) and recurrent (R) GBM

138 *samples; d) Networks of genes (nodes) for which expression is highly correlated (edges:  $R > |0.9|$ )*  
139 *with LE70 genes in the primary (blue, top left) and recurrent (orange, right) GBM samples.*

140

141 **The same JBSgenes are dysregulated in each response subtype and their promoter DNA is**  
142 **unmethylated in both primary and recurrent GBMs**

143 To investigate whether the JBSgenes driving the enrichment differed across individual patients or  
144 between response subtypes, we quantified how often each gene was present in the leading edge  
145 of the GSEA results across the 45 patients in the original and validation cohorts combined. 335  
146 genes were observed in the leading edge of more than 50% of patients (denoted LE50 genes) and  
147 43 genes in more than 70% (LE70 genes) (Supp.Table.3). The per-patient fold-changes of the  
148 LE50 genes showed that these same JBSgenes drive the enrichment across patients irrespective  
149 of response subtype i.e. the same genes are downregulated in D response patients as are  
150 upregulated in U response patients (Fig.2a). The LE50 genes are enriched in functional  
151 annotations associated with neurodevelopment and neuronal differentiation such as synaptic  
152 plasticity and interneuronal communication (Fig.2b and Supp.Table.4). To investigate the DNA  
153 methylation status of the promoters of these genes in primary and recurrent GBMs, in comparison  
154 to other genes, we performed genome-wide methylation arrays on DNA from 9 pairs (see  
155 Supp.Table.1). No gene promoters were differentially methylated between primary and recurrent  
156 samples ( $q > 0.45$  for all genes). However, the distribution of promoter methylation across all genes  
157 was significantly different to that of the JBSgenes and the LE50 genes in isolation, revealing that  
158 the DNA in the promoters of the latter two is unmethylated in both the primary and recurrent GBMs  
159 (Fig.2c). This indicates that the change in expression of these genes that we observe post-  
160 treatment is not driven by DNA methylation.

161 **LE70 JBSgenes are more coordinately expressed in recurrent GBM**

162 We hypothesised that JARID2 is involved in the tighter co-regulation of leading edge JBSgenes in  
163 GBM tumours after treatment, independent of whether that results in an increase or decrease in  
164 their expression. To investigate this, we identified all genes for which expression is highly  
165 correlated ( $R > |0.9|$ ) in the primary GBMs and recurrent GBMs separately. We then determined the  
166 prevalence of the LE70 genes and their connectivity in these two correlation networks. We found

167 that the LE70 JBSgenes correlate with significantly more genes and with significantly more  
168 connectivity in recurrent versus primary samples: 1% (29/2603) in the primary GBM network  
169 compared to 7% (202/2855) in the recurrent GBM network (chi-squared;  $p=0$  for both tests)  
170 (Fig.2d). This implies that either cells in which these genes are co-regulated by JARID2 become  
171 more prevalent post-treatment, or that their co-regulation by JARID2 occurs in response to  
172 treatment. To inspect this further we designed an *in vitro* experiment to investigate the time course  
173 of JBSgene dysregulation following treatment.

### 174 **Single cell analysis indicates that JARID2 associated gene co-regulation is an adaptive** 175 **response to therapy**

176 We cultured two plates of spheroids directly from a freshly resected primary GBM, in serum-free  
177 conditions. We treated one plate with physiologically relevant single doses of TMZ (30 $\mu$ M) and  
178 radiation (2Gy). We captured and sequenced RNA from single cells from spheroids one week post-  
179 treatment when there was a significant deviation in the untreated vs treated spheroid growth  
180 curves, and three weeks post-treatment when growth of the treated spheroids appeared to have  
181 recovered (Fig.3). Our bespoke GSEA revealed that JBSgenes were significantly enriched  
182 amongst the genes altered in treated versus untreated spheroids three-weeks post-treatment  
183 (FDR=0.18) but not one week post-treatment (FDR=0.65). Furthermore, the genes that were DE  
184 ( $p<0.05$ ) between treated and untreated cells included significantly more LE50 genes at the three-  
185 week time point compared to the one week time-point (chi-squared,  $p=0.007$ ). These results  
186 suggest that the universal JBSgene dysregulation that we observe in recurrent tumours is not  
187 caused by selection of a fixed transcriptional profile, but rather transcriptional reprogramming  
188 following treatment.

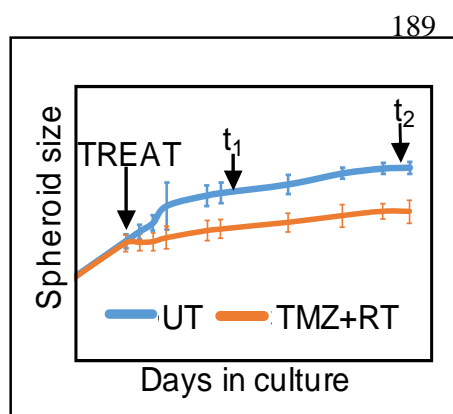

**Fig.3.** Growth curves for untreated (UT) and treated (TMZ+RT) patient-derived GBM spheroids. Time of treatment (TREAT) is indicated (arrow), in relation to single cell capture 1 week ( $t_1$ ) and 3 weeks ( $t_2$ ) post-treatment.



190

191

192

193 **JARID2 is involved in cell plasticity and implicated in interconversions between cell states**

194 **in glioma**

195 JARID2 is an accessory protein responsible for the genomic positioning of Polycomb Repressive

196 Complex 2 (PRC2)<sup>[12]</sup>. PRC2 is a chromatin remodeller that is indispensable for lineage

197 determination during neurogenesis<sup>[10]</sup>. It is responsible for the trimethylation of lysine 27 on histone

198 H3 (H3K27me3) which results in epigenetic silencing of the marked gene. PRC2 is directly

199 implicated

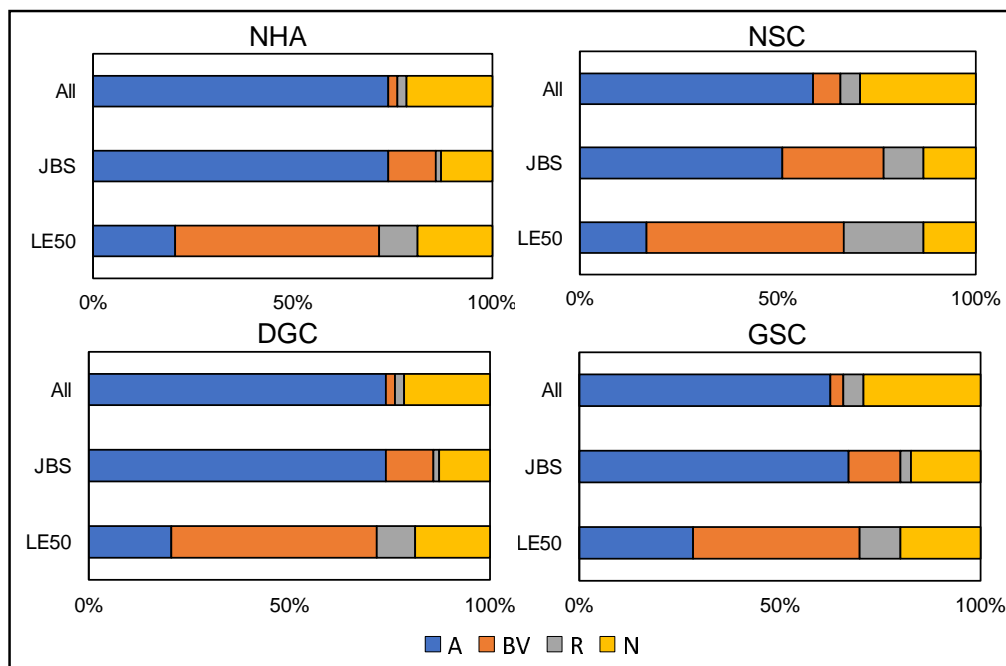

200

201 **Fig.4** Relative quantification of promoter status, with respect to specific histone marks, across all

202 genes compared to JBSgenes and LE50 genes in normal human astrocytes (NHA), neural stem

203 cells (NSC), differentiated glioma cells (DGC) and glioma stem cells (GSC). A=active=H3K4me3;

204 R=repressed=H3K27me3; BV=bivalent=H3K27me3+H3K4me3; and N=neither mark.

205

206 in cell plasticity in GBM by studies showing that its catalytic subunit is required to enable

207 conversions between stem-like and differentiated cell types<sup>[11]</sup>. It is also indirectly implicated by the

208 fact that the prevalence and location of H3K27me3 significantly differs between normal brain and

209 glioma cells, and between GBM cells with different phenotypes<sup>[17]</sup>. These differences occur most  
 210 frequently at bivalent promoters: those harbouring both the repressive H3K27me3 and an  
 211 activating mark (H3K4me3) causing the gene to be silenced but primed for activation upon PRC2  
 212 disassociation and H3K27 demethylation. Developmental gene promoters are commonly bivalent  
 213 in embryonic stem cells to enable subsequent rapid activation of specific lineage determination  
 214 genes once cell fate is resolved, further highlighting PRC2's role in cell-type transitions<sup>[18]</sup>.

215 To determine whether JBSgenes, and specifically the LE50 genes, are implicated in cell  
 216 type switching we mined published data on histone marks (H3K27me3 and H3K4me3) and gene  
 217 expression in different normal and GBM cell types<sup>[17, 19]</sup>. Normal brain cell types were human  
 218 neural stem cells (NSCs) and normal human astrocytes (NHAs). Different GBM 'cell types' pertains  
 219 to the

220

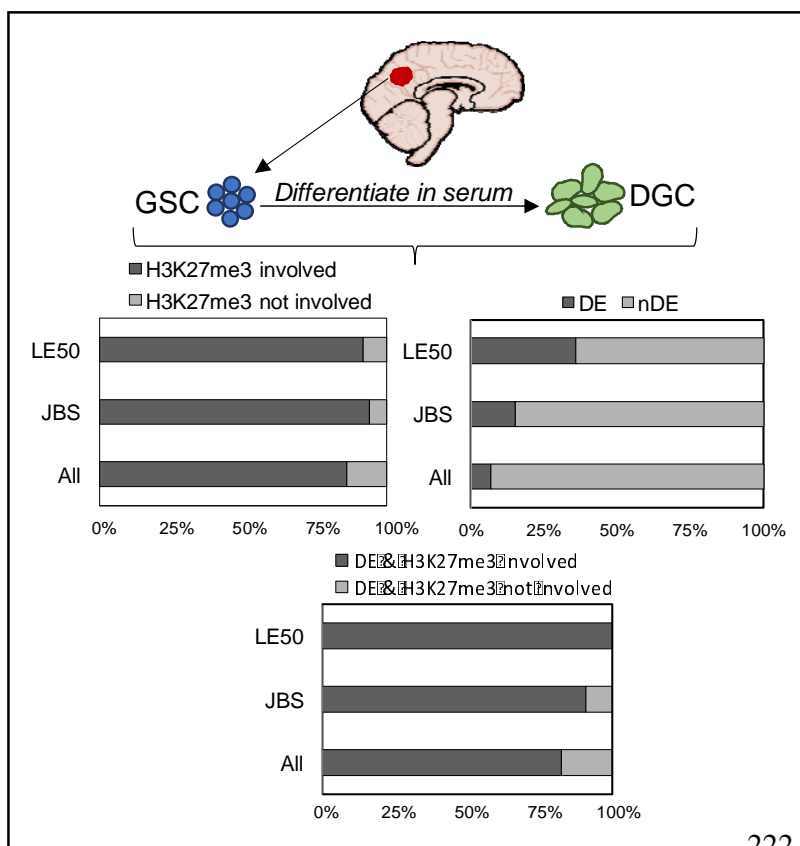

**Fig.5.** Glioma stem cell (GSC) cell lines can be derived from patient GBM tumours and then further cultured in serum to form differentiated glioma cells (DGC). The bar charts indicate the proportion of genes for which H3K27me3 is involved in any changes in promoter status (top left), or which were differentially expressed (DE, top right), or both (bottom), between matched GSC and DGC cell lines for all genes, JBSgenes or LE50 genes ability to derive phenotypically

223 distinct cell lines from the same patient GBM under different conditions: those which enrich for  
 224 glioma stem cells (GSCs, which can be considered analogous to

225 NSCs in the normal brain) and those which enrich for differentiated glioma cells (DGCs, somewhat  
226 analogous to NHAs)<sup>[20]</sup>. We first quantified promoter status for each different cell types:  
227 active=H3K4me3; repressed=H3K27me3; bivalent=H3K27me3+H3K4me3; and neither mark. In  
228 support of the role of JARID2 as a PRC2 accessory protein, and increasing confidence that our  
229 novel gene set has captured bona fide JBSgenes, we found that H3K27me3 was significantly  
230 enriched at JBSgenes in all cell types investigated (Fig.4: middle compared to top barplot in each  
231 panel; grey and orange shading pertains to promoters with the H3K27me3 mark), and that this was  
232 particularly pronounced at bivalent promoters (Fig.4; orange shading). Moreover, the presence of  
233 H3K27me3, again especially at bivalent promoters, was further significantly enriched within the  
234 LE50 subset of JBSgenes (Fig.4 bottom compared to middle barplot in each panel). We then  
235 characterized changes in promoter status between cells of different phenotype in the normal brain  
236 (NPC vs NHA) and GBM (GSC vs DGC: Fig.5). We found, in agreement with the results from the  
237 original publication, that changes involving H3K27me3 are more pronounced than any other. We  
238 further found that this is significantly more evident in the promoters of JBSgenes: 85% of changes  
239 between NPC and NHA involve H3K27me3 at JBSgene promoters compared to 76% at all gene  
240 promoters (chi- squared,  $p= 3.9 \times 10^{-8}$ ) and 93% of changes between GSC and DGC involve  
241 H3K27me3 at JBSgene promoters compared to 78% at all gene promoters (Fig.5; chi-squared,  $p=$   
242  $5.6 \times 10^{-4}$ ). This implicates JARID2 in chromatin remodeling of gene promoters that differ between  
243 cell types in the both normal brain and in GBM.

244 To determine whether this remodeling associates with gene expression changes we  
245 identified genes that are DE ( $q < 0.2$ ) between GSC and DGC using RNAseq data from Patel et  
246 al.<sup>[19]</sup> from matched lines derived from three patient samples. As shown in Fig.5, we found that  
247 significantly more JBSgenes are DE (15% JBSgenes vs 5% of non-JBSgenes; chi-squared,  $p=0$ )  
248 and that, within the JBSgenes, significantly more LE50 genes are DE (36% of LE50 genes vs 15%  
249 of remaining JBSgenes; chi-squared,  $p=2.5 \times 10^{-5}$ ). We then overlaid the expression and histone  
250 mark data and found, as also shown in Fig.5, that chromatin remodeling involving H3K27me3 is  
251 more pronounced at DE JBSgenes (91% of changes at DE JBSgene promoters involve  
252 H3K27me3) and DE LE50 genes (100% of changes) compared with all DE genes (where 82% of  
253 promoter status changes involve H3K27me3). Together, these data suggest that chromatin

254 remodeling associated with JARID2 affects the expression of genes that distinguish different cell  
255 types in the normal and human brain.

256

## 257 **DISCUSSION**

258 We found that the genes differentially expressed between pairs of primary and locally recurrent  
259 GBM tumours post standard treatment were enriched for those involved in brain cell development  
260 and lineage determination, suggesting that GBM cell types defined within neurodevelopmental-like  
261 transcriptional hierarchies may be associated with treatment resistance and tumour regrowth in  
262 patients. Brain and GBM cell specification results from a combination of the concerted action of  
263 transcription factors (TFs) and differential genome accessibility imposed by a variety of chromatin  
264 remodeling molecules and complexes. We, therefore, applied an unbiased approach to investigate  
265 whether any such DNA-binding factors were repeatedly implicated across patients in the master  
266 regulation of genes for which we observe altered expression in recurrent versus primary GBM  
267 tumours. We found that genes with Jumonji and AT-Rich Interacting Domain 2 (JARID2) binding  
268 site(s) in their promoter (JBSgenes) are consistently and significantly dysregulated in recurrent  
269 GBM tumours, in both our original and validation cohorts. JARID2 is indirectly responsible for  
270 eliciting the programmes of epigenetic gene silencing required for cell lineage determination during  
271 neurodevelopment<sup>[9]</sup>. It does so by docking Polycomb Repressive Complex 2 (PRC2) to specific  
272 genomic loci where it trimethylates H3K27 to repress gene expression<sup>[12, 21]</sup>. As well as normal  
273 brain cell delineation, PRC2 and the H3K27me3 mark have been specifically implicated in cell  
274 state transitions in glioblastoma<sup>[11, 17, 22]</sup>. However, the involvement of JARID2 in this process, and  
275 the genes in which expression is altered by this mechanism to dictate GBM cell phenotype have  
276 not previously been elucidated. Our results highlight subsets of genes with JARID2 binding sites in  
277 their promoters (JBSgenes) that are most commonly dysregulated (LE50 in more than 50% and  
278 LE70 in more than 70% of patients) in GBM tumours after treatment. In support of the notion that  
279 expression of these genes is regulated by JARID2-associated mechanisms in GBM, we have  
280 shown that the DNA in their promoters is unmethylated in both primary and recurrent samples and  
281 that their promoters are significantly more associated with the H3K27me3 mark than those of other  
282 genes in GBM cell lines. The increasing importance of this coordinated regulation by JARID2 in

283 GBM after treatment is indicated by the larger and more connected networks of highly correlated  
284 LE70 JBSgenes in recurrent versus primary samples.

285 Together these results could suggest that specific GBM cell types, defined by  
286 transcriptional profiles resulting from JARID2-associated epigenetic programming, resist treatment  
287 and expand during tumour recurrence. It is widely thought, for example, that glioma stem cells  
288 specifically resist treatment and are responsible for GBM regrowth<sup>[23, 24]</sup>. However, a confounding  
289 result in relation to this interpretation is the fact that, whilst a specific subset of JBSgenes are  
290 universally dysregulated in recurrent versus primary tumours, the direction of dysregulation is  
291 inconsistent; the same genes are upregulated in the recurrence in ~70% of patients and down-  
292 regulated in the remaining 30%. Furthermore, our *in vitro* work indicates that changes in  
293 expression of JBSgenes occurs dynamically following treatment as opposed to resulting from an  
294 increased signal from expansion of a fixed transcriptional profile. Our hypothesis is, therefore, that  
295 JARID2-associated chromatin remodeling is not a treatment resistance mechanism per se, but a  
296 mechanism by which GBM tumours recover from treatment to enable regrowth. In this way, the  
297 different directions of gene dysregulation are owing to the need to recapitulate the GBM  
298 transcriptional heterogeneity, required for tumour growth *in vivo*, from whichever cell types  
299 survived in that particular patient<sup>[13, 25, 26]</sup>. This is supported by our findings that the JBSgenes  
300 dysregulated during treatment are a) significantly more likely to have bivalent promoters (i.e.  
301 poised for activity relating to lineage decisions in response to environmental queues) and b)  
302 significantly enriched amongst the genes differentially expressed between cells at either end of the  
303 GBM transcriptional hierarchy (i.e. glioma stem cells and differentiated glioma cells). Recent  
304 landmark findings also support our hypothesis, which posits that different GBM cell types are able  
305 to resist treatment and that interconversions between cell types, as opposed to one-way transitions  
306 down a differentiation pathway, are needed to enable tumour regrowth: i) differentiated GBM cells  
307 form networks *in vivo* that enable them to better survive chemoradiation, negating the idea that  
308 only stem-like cells are able to survive<sup>[27]</sup>; ii) glioma stem-cells, needed for tumour regrowth owing  
309 to their proliferation capabilities, can form via non-hierarchical conversion of differentiated cells in  
310 GBM<sup>[11, 14, 25]</sup>.

311 Our hypothesis represents a paradigm shift, also recently suggested by Dirkse et al.<sup>[25]</sup>, that  
312 challenges the notion that effective treatment of GBM will be possible by therapeutically targeting  
313 any one cell population, such as glioma stem cells. Instead, we propose that effective treatment  
314 will only be possible by targeting the mechanisms of GBM cell plasticity resulting from  
315 transcriptional reprogramming, which our results suggest are fundamentally linked with the role of  
316 JARID2. The precise nature of this role, and its potential for therapeutic targeting, are the focus of  
317 our ongoing work.

318

## 319 **CONCLUSION**

320 We have found that a subset of genes is universally dysregulated in patient GBMs following  
321 standard treatment, likely because of epigenetic remodeling of their promoters via mechanisms  
322 involving JARID2, as an adaptive response that facilitates tumour regrowth. The direction of this  
323 adaptive response is, however, not constant across patients and may depend upon the cell state  
324 transitions needed to recapitulate transcriptional heterogeneity in the recurrent tumour. This is the  
325 first time that JARID2 has been implicated in GBM cell plasticity in association with tumour  
326 recurrence, and highlights subsets of genes that may be involved in cell state transitions required  
327 for adaption of GBM tumours to treatment.

328

## 329 **METHODS**

### 330 **Archival Samples and Profiling Data**

331 Four independent sources of paired patient GBM samples (surgical tissue from primary GBM and  
332 subsequent recurrent samples) were used in this work. Samples were allocated to the original  
333 cohort if they had undergone whole transcriptome RNA sequencing, and to the validation cohort if  
334 they had undergone poly-A transcriptome sequencing. Clinical information and cohort assignment  
335 are given in Supp.Table.1.

336 Stead Samples: 21 patients from four tissue banks (Leeds, Liverpool, Cambridge and Preston)  
337 with tumour in paraffin blocks. Ethical approval was acquired (REC 13/SC/0509). RNA and DNA  
338 was extracted from the same cells from neuropathologist annotated tumour regions (>60% cancer  
339 cells) using appropriate Qiagen kits (Qiagen, Sussex, UK). Paired end strand-specific whole

340 transcriptome libraries were prepared for 16 pairs using the NEBNext Ultra Directional RNA Library  
341 Prep Kit for Illumina (New England BioLabs, UK), following rRNA depletion with NEBNext rRNA  
342 Depletion Kit or Ribo-Zero Gold. Libraries were sequenced on an Illumina HiSeq. DNA from 9 pairs  
343 (4 of which also underwent RNAseq) was profiled using the Illumina Infinium Human Methylation  
344 450K Bead Chip array.

345 Rabadan Samples: Nine patients from Wang et al.<sup>[4]</sup> with transcriptome sequencing data (7 with  
346 whole transcriptome data and 2 with poly-A transcriptome data) for paired tumours, downloadable  
347 from the sequencing read archive (accession SRP074425).

348 Verhaak Samples: Four patients from Kim et al.<sup>[1]</sup> with poly-A transcriptome sequencing alignment  
349 data acquired, and converted to raw fastq format, following application to the European Genome-  
350 Phenome Archive (accession EGAS00001001033).

351 Nam Samples: 16 patients from Kim et al.<sup>[5]</sup> with poly-A transcriptome sequencing alignment data  
352 acquired, and converted to raw fastq format, following application to the European Genome-  
353 Phenome Archive (accession EGAD00001001424).

#### 354 **Sequencing Data: Alignment, Differential Expression, Functional Enrichment and** 355 **Correlation Analysis**

356 RNAseq data was analysed as previously described except that reads were aligned to human  
357 reference genome GRCh38, using the gencode.v27 genome annotation as a guide, using  
358 STARv2.4.3a and functional enrichment analysis was done using WebGestalt<sup>[28-30]</sup>.

#### 359 **Gene set enrichment analysis (GSEA)**

360 We developed a novel gene set file for use in GSEA using the Gene Transcription Regulation  
361 Database (GTRD v18.01), which contained the genomic binding locations of 682 human DNA-  
362 binding factors from 4236 chromatin immunoprecipitation sequencing (ChIPseq) experiments<sup>[16]</sup>. A  
363 gene was assigned to a DNA-binding factor's gene set if its promoter (transcription start site from  
364 gencodev27  $\pm$ 1kbp) contained a binding site for that factor in  $\geq$ 2 independent ChIPseq  
365 experiments. We first performed pre-ranked GSEA, per patient, ordering genes by the magnitude  
366 of fold change in expression  $\log_2(\text{recurrent FPKM} + 0.01 / \text{primary FPKM} + 0.01)$  in classical mode.  
367 To indicate directionality of dysregulation we then ranked genes by absolute fold changes ie. using  
368  $\log_2(\text{recurrent FPKM} + 0.01 / \text{primary FPKM} + 0.01)$  and weighted by magnitude<sup>[31]</sup>.

## 369 **DNA methylation analysis**

370 The RnBeads package was used to import, quality check and preprocess IDAT files and then  
371 perform pairwise differential methylation analysis. The combined and adjusted p-value  
372 (comb.p.adj.fdr) in the promoter results file was used to determine significance. The average  
373 methylation signal for each promoter (mean.mean) was extracted for both the primary and  
374 recurrent samples and used to plot the distribution for different genes subsets in R using the  
375 density function.

## 376 **Patient-derived spheroids**

377 A patient presenting with a suspected GBM was consented for the use of their tissue in research  
378 through the Leeds Multidisciplinary Research Tissue Bank (REC 15/YH/0080). GBM diagnosis was  
379 confirmed intraoperatively by a neuropathologist who identified a tumour cell rich piece of tissue,  
380 surplus to diagnosis, for transport to the laboratory in cold PBS for use in this work. Tissue was  
381 washed in PBS and chopped in Accutase (Sigma-Aldrich, 500 $\mu$ L) before incubation at 37°C for 5  
382 min. The sample was triturated and Neural Basal (NB) medium, consisting of Neurobasal Medium,  
383 N2 and B27 supplements (ThermoFisher, 250mL, 1.25 and 2.5mL respectively), recombinant basic  
384 fibroblast growth factor (bFGF), and epidermal growth factor (EGF) (R&D Systems 40ng/mL each),  
385 was added to a total volume of 10 mL prior to spinning (1200 rpm at 5 min). The pellet was  
386 resuspended in 5ml DNaseI then 1ml RBC lysis buffer (VWR International) with 1 min incubation at  
387 room temp, addition of PBS to 10mL and further spinning following each resuspension. The pellet  
388 was resuspended in 10mL PBS, filtered via a 70 $\mu$ m and 30 $\mu$ m strainer consecutively and counted.  
389 Finally, cells were resuspended in NB-medium to a concentration of 2x10<sup>4</sup>cells/1mL with 200 $\mu$ L of  
390 this cell suspension added into each well of an ultra-low-adherence plate and incubated at 37°C  
391 5%CO<sub>2</sub>. 100 $\mu$ L of medium was replaced per well every 3 days. Cells were imaged regularly on the  
392 EVOS Cell Imaging System (ThermoFisher) until they reached approximately 300 $\mu$ m in diameter.  
393 At this point TMZ (Sigma) was concentrated in 100 $\mu$ L of NB media and used in a media  
394 replacement for one plate of cells to give a final dose, per well, of 30 $\mu$ M; one hour later the same  
395 plate was irradiated with 2Gy.

## 396 **Single cell capture and sequencing**

397 Single cells were captured from treated spheroids 1 week and 3 weeks post-treatment, and cells



398 from untreated spheroids the following day, by extracting and combining 8 spheroids per time point  
399 and dissociating them via a PBS wash, Accutase incubation, and further PBS washing (as above)  
400 to a concentration of  $2.5 \times 10^5$  cells/mL. Cells were diluted in C1 cell suspension reagent at a ratio  
401 of 3:2, respectively. Single cells were captured on a medium (10–17  $\mu$ M) C1 Single-Cell Auto Prep  
402 IFC for mRNAseq, lysed and underwent on-chip cDNA amplification via SMART Seq2 according to  
403 the manufacturer's instructions using the Fluidigm C1 Single-Cell Auto Prep System and protocols  
404 on Script Hub™ (Fluidigm)<sup>[32]</sup>. cDNA was quantified using the High Sensitivity DNA Assay on the  
405 Agilent 2100 Bioanalyser and paired end Nextera XT (Illumina) libraries were made and  
406 sequenced, with multiplexing using indexes provided by Dr Iain Macaulay, on an Illumina HiSeq.  
407 RNA sequencing data was processed and expression was quantified as per the bulk tissue. GSEA  
408 analysis was performed twice using expression (in fragments per kilobase per million mapped)  
409 datasets to identify differences between untreated and treated cells at the 1 week timepoint and  
410 three week timepoint separately. Differentially expressed genes were identified using Seurat<sup>[33]</sup>.

#### 411 **Cell type expression and histone modification status**

412 Data on gene promoter histone status in different normal and GBM cell types were extracted from  
413 the supplementary material (Table S2) from Rheinbay et al.<sup>[17]</sup>. This included data from three  
414 patient GBM tumours that had been used to derive glioma stem cells (GSCs) which were  
415 subsequently cultured in serum to produce differentiated glioma cells (DGC). We required that all  
416 three samples had been assigned the same status to be included in our analyses. Raw  
417 sequencing data was downloaded on a further three GSC and DGC pairs from Patel et al.<sup>[19]</sup> via  
418 the Gene Expression Omnibus (accession GSE57872). These data were processed and aligned,  
419 and pairwise differential expression analysis was performed, exactly as for the paired primary and  
420 recurrent RNAseq data. Quantification and assessment of the significance of overlap in genes with  
421 different promoter states and/or differential expression with the JBSgenes or LE50 genes was  
422 done in the R statistical package.

423

#### 424 **LIST OF ABBREVIATIONS**

425 ChIP- Chromatin immunoprecipitation

426 DE – Differentially expressed

427 DGC – Differentiated glioma cell  
428 GBM – Glioblastoma  
429 GSC – Glioma stem cell  
430 GSEA – Gene set enrichment analysis  
431 H3K4me3 - Trimethylated histone 3 at lysine 4  
432 H3K27me3 – Trimethylated histone 3 at lysine 27  
433 JARID2 - Jumonji And AT-Rich Interaction Domain Containing 2  
434 JBSgenes – JARID2 binding site genes  
435 LE - Leading edge  
436 NES – Normalized enrichment score  
437 PRC2 – Polycomb Repressive Complex 2  
438 RNAseq – RNA sequencing  
439 TF – Transcription factor  
440

#### 441 **DECLARATIONS**

##### 442 ***Ethics approval and consent to participate***

443 All patients whose data was used in this study consented to the use of their tissue in research. The  
444 data generated for this study was used in accordance with ethical approval acquired from NHS  
445 NRES Committee South Central - Oxford A (REC 13/SC/0509).

##### 446 ***Consent for publication***

447 Not applicable

##### 448 ***Availability of data and materials***

449 The RNAseq datasets analysed during the current study are available in the following repositories:  
450 Rabadan samples are downloadable from the sequencing read archive (accession SRP074425);  
451 Verhaak and Nam samples are available following application to the European Genome-Phenome  
452 Archive (accession numbers EGAS00001001033 and EGAD00001001424, respectively). The  
453 RNAseq and DNA methylation datasets generated during the current study are not publicly  
454 available as data transfer agreements are required to ensure compliance with ethical approvals but  
455 are available from the corresponding author on reasonable request.

456 ***Competing interests***

457 The authors declare that they have no competing interests

458 ***Funding***

459 This work was funded by grants from Leeds Charitable Foundation, now Leeds Cares (9R11/14-11  
460 to LFS); Yorkshire Cancer Research, Brain Tumour Research and Support and Ellie's Fund  
461 (LPP072 to LFS); and personal fellowships awarded to LFS (funded by The Wellcome Trust and  
462 the University of Leeds) and AD (funded by UKRI, MR/S00386X/1). The funding bodies had no  
463 role in the design of the study, the collection, analysis, or interpretation of data or in writing the  
464 manuscript.

465 ***Authors' contributions***

466 LFS devised the project. LFS and SS acquired funding. MDJ and AB sourced samples and  
467 provided clinical annotation. NR and AFB processed samples following annotation and diagnostic  
468 confirmation from AC and AI. LFS, GT, AD, MC and JW performed data analysis and LFS  
469 interpreted it. NR performed experimental work with assistance from ABR. NR and CT captured  
470 and sequenced single cells. LFS wrote the manuscript, which was reviewed and approved by all  
471 authors.

472 ***Acknowledgements***

473 Tissue was sourced from: the Brain Tumour Northwest tissue bank (including the Walton research  
474 tissue bank) funded by the Sidney Driscoll Neuroscience Foundation and part of the Walton Centre  
475 and Lancashire Teaching Hospitals NHS Foundation Trusts; the Leeds Multidisciplinary Research  
476 Tissue Bank with staff funded by the PPR Foundation and part of the University of Leeds and  
477 Leeds Teaching Hospitals NHS Trust; the Human Research Tissue Bank, part of the Cambridge  
478 University Hospitals NHS Foundation Trust. Access to the latter was coordinated as part of the UK  
479 Brain Archive Information Network (BRAIN UK) which is funded by the Medical Research Council  
480 and brainstrust. We would like to thank Dr Iain Macaulay of The Earlham Institute in Norwich for  
481 his support for single cell work, and for providing indexes to enable single cell multiplexing. We  
482 would also like to thank the authors of publications from which we were able to access data for use  
483 in our research.

484

485 **REFERENCES**

- 486 1. Kim H, Zheng S, Amini SS, Virk SM, Mikkelsen T, Brat DJ, Grimsby J, Sougnez C, Muller F, Hu  
487 J, et al: **Whole-genome and multisector exome sequencing of primary and post-**  
488 **treatment glioblastoma reveals patterns of tumor evolution.** *Genome Res* 2015, **25**:316-  
489 327.
- 490 2. Droop A, Bruns A, Tanner G, Rippaus N, Morton R, Harrison S, King H, Ashton K, Syed K,  
491 Jenkinson MD, et al: **How to analyse the spatiotemporal tumour samples needed to**  
492 **investigate cancer evolution: A case study using paired primary and recurrent**  
493 **glioblastoma.** *Int J Cancer* 2017.
- 494 3. Körber V, Yang J, Barah P, Wu Y, Stichel D, Gu Z, Fletcher MNC, Jones D, Hentschel B,  
495 Lamszus K, et al: **Evolutionary Trajectories of IDHWT Glioblastomas Reveal a Common**  
496 **Path of Early Tumorigenesis Instigated Years ahead of Initial Diagnosis.** *Cancer Cell* 2019,  
497 **35**:692-704.e612.
- 498 4. Wang J, Cazzato E, Ladewig E, Frattini V, Rosenbloom DIS, Zairis S, Abate F, Liu Z, Elliott O,  
499 Shin Y-J, et al: **Clonal evolution of glioblastoma under therapy.** *Nat Genet* 2016, **48**:768-  
500 776.
- 501 5. Kim J, Lee I-H, Cho Hee J, Park C-K, Jung Y-S, Kim Y, Nam So H, Kim Byung S, Johnson  
502 Mark D, Kong D-S, et al: **Spatiotemporal Evolution of the Primary Glioblastoma Genome.**  
503 *Cancer Cell* 2015, **28**:318-328.
- 504 6. Aldape K, Amin SB, Ashley DM, Barnholtz-Sloan JS, Bates AJ, Beroukhim R, Bock C, Brat DJ,  
505 Claus EB, Costello JF, et al: **Glioma Through the Looking GLASS: Molecular Evolution of**  
506 **Diffuse Gliomas and the Glioma Longitudinal AnalySiS Consortium.** *Neuro-Oncology*  
507 2018:noy020-noy020.
- 508 7. Meyer M, Reimand J, Lan X, Head R, Zhu X, Kushida M, Bayani J, Pressey JC, Lionel AC,  
509 Clarke ID, et al: **Single cell-derived clonal analysis of human glioblastoma links functional**  
510 **and genomic heterogeneity.** *Proc Natl Acad Sci U S A* 2015, **112**:851-856.
- 511 8. Lan X, Jorg DJ, Cavalli FMG, Richards LM, Nguyen LV, Vanner RJ, Guilhamon P, Lee L,  
512 Kushida MM, Pellacani D, et al: **Fate mapping of human glioblastoma reveals an invariant**  
513 **stem cell hierarchy.** *Nature* 2017, **549**:227-232.
- 514 9. Al-Raawi D, Jones R, Wijesinghe S, Halsall J, Petric M, Roberts S, Hotchin NA, Kanhere A: **A**  
515 **novel form of JARID2 is required for differentiation in lineage-committed cells.** *The EMBO*  
516 *Journal* 2018:e98449.
- 517 10. Corley M, Kroll KL: **The roles and regulation of Polycomb complexes in neural**  
518 **development.** *Cell and tissue research* 2015, **359**:65-85.
- 519 11. Natsume A, Ito M, Katsushima K, Ohka F, Hatanaka A, Shinjo K, Sato S, Takahashi S,  
520 Ishikawa Y, Takeuchi I, et al: **Chromatin Regulator PRC2 Is a Key Regulator of Epigenetic**  
521 **Plasticity in Glioblastoma.** *Cancer Research* 2013, **73**:4559.
- 522 12. Shen X, Kim W, Fujiwara Y, Simon MD, Liu Y, Mysliwiec MR, Yuan G-C, Lee Y, Orkin SH:  
523 **Jumonji Modulates Polycomb Activity and Self-Renewal versus Differentiation of Stem**  
524 **Cells.** *Cell* 2009, **139**:1303-1314.
- 525 13. Wang X, Prager BC, Wu Q, Kim LJY, Gimple RC, Shi Y, Yang K, Morton AR, Zhou W, Zhu Z, et  
526 al: **Reciprocal Signaling between Glioblastoma Stem Cells and Differentiated Tumor Cells**  
527 **Promotes Malignant Progression.** *Cell Stem Cell* 2018, **22**:514-528.e515.
- 528 14. Suvà Mario L, Rheinbay E, Gillespie Shawn M, Patel Anoop P, Wakimoto H, Rabkin  
529 Samuel D, Riggi N, Chi Andrew S, Cahill Daniel P, Nahed Brian V, et al: **Reconstructing and**  
530 **Reprogramming the Tumor-Propagating Potential of Glioblastoma Stem-like Cells.** *Cell*  
531 2014, **157**:580-594.

- 532 15. Podobinska M, Szablowska-Gadomska I, Augustyniak J, Sandvig I, Sandvig A, Buzanska L:  
533 **Epigenetic Modulation of Stem Cells in Neurodevelopment: The Role of Methylation and**  
534 **Acetylation.** *Frontiers in Cellular Neuroscience* 2017, **11**:23.
- 535 16. Yevshin I, Sharipov R, Valeev T, Kel A, Kolpakov F: **GTRD: a database of transcription factor**  
536 **binding sites identified by ChIP-seq experiments.** *Nucleic Acids Research* 2017, **45**:D61-  
537 D67.
- 538 17. Rheinbay E, Suvà Mario L, Gillespie Shawn M, Wakimoto H, Patel Anoop P, Shahid M, Oksuz  
539 O, Rabkin Samuel D, Martuza Robert L, Rivera Miguel N, et al: **An Aberrant Transcription**  
540 **Factor Network Essential for Wnt Signaling and Stem Cell Maintenance in Glioblastoma.**  
541 *Cell Reports* 2013, **3**:1567-1579.
- 542 18. Bernstein BE, Mikkelsen TS, Xie X, Kamal M, Huebert DJ, Cuff J, Fry B, Meissner A, Wernig  
543 M, Plath K, et al: **A Bivalent Chromatin Structure Marks Key Developmental Genes in**  
544 **Embryonic Stem Cells.** *Cell* 2006, **125**:315-326.
- 545 19. Patel AP, Tirosh I, Trombetta JJ, Shalek AK, Gillespie SM, Wakimoto H, Cahill DP, Nahed BV,  
546 Curry WT, Martuza RL, et al: **Single-cell RNA-seq highlights intratumoral heterogeneity in**  
547 **primary glioblastoma.** *Science* 2014, **344**:1396.
- 548 20. Lee J, Kotliarova S, Kotliarov Y, Li A, Su Q, Donin NM, Pastorino S, Purow BW, Christopher  
549 N, Zhang W, et al: **Tumor stem cells derived from glioblastomas cultured in bFGF and EGF**  
550 **more closely mirror the phenotype and genotype of primary tumors than do serum-**  
551 **cultured cell lines.** *Cancer Cell* 2006, **9**:391-403.
- 552 21. Kaneko S, Bonasio R, Saldaña-Meyer R, Yoshida T, Son J, Nishino K, Umezawa A, Reinberg  
553 D: **Interactions between JARID2 and Noncoding RNAs Regulate PRC2 Recruitment to**  
554 **Chromatin.** *Molecular Cell* 2014, **53**:290-300.
- 555 22. Liao BB, Sievers C, Donohue LK, Gillespie SM, Flavahan WA, Miller TE, Venteicher AS,  
556 Hebert CH, Carey CD, Rodig SJ, et al: **Adaptive Chromatin Remodeling Drives Glioblastoma**  
557 **Stem Cell Plasticity and Drug Tolerance.** *Cell Stem Cell* 2017, **20**:233-246.e237.
- 558 23. Chen J, Li Y, Yu T-S, McKay RM, Burns DK, Kernie SG, Parada LF: **A restricted cell population**  
559 **propagates glioblastoma growth after chemotherapy.** *Nature* 2012, **488**:522.
- 560 24. Singh SK, Hawkins C, Clarke ID, Squire JA, Bayani J, Hide T, Henkelman RM, Cusimano MD,  
561 Dirks PB: **Identification of human brain tumour initiating cells.** *Nature* 2004, **432**:396-401.
- 562 25. Dirkse A, Golebiewska A, Buder T, Nazarov PV, Muller A, Poovathingal S, Brons NHC, Leite  
563 S, Sauvageot N, Sarkisjan D, et al: **Stem cell-associated heterogeneity in Glioblastoma**  
564 **results from intrinsic tumor plasticity shaped by the microenvironment.** *Nature*  
565 *Communications* 2019, **10**:1787.
- 566 26. Wang Q, Hu B, Hu X, Kim H, Squatrito M, Scarpace L, deCarvalho AC, Lyu S, Li P, Li Y, et al:  
567 **Tumor Evolution of Glioma-Intrinsic Gene Expression Subtypes Associates with**  
568 **Immunological Changes in the Microenvironment.** *Cancer Cell* 2017, **32**:42-56.e46.
- 569 27. Osswald M, Jung E, Sahm F, Solecki G, Venkataramani V, Blaes J, Weil S, Horstmann H,  
570 Wiestler B, Syed M, et al: **Brain tumour cells interconnect to a functional and resistant**  
571 **network.** *Nature* 2015, **528**:93.
- 572 28. Dobin A, Davis CA, Schlesinger F, Drenkow J, Zaleski C, Jha S, Batut P, Chaisson M, Gingeras  
573 TR: **STAR: ultrafast universal RNA-seq aligner.** *Bioinformatics* 2012, **29**:15-21.
- 574 29. Conway C, Graham JL, Chengot P, Daly C, Chalkley R, Ross L, Droop A, Rabbitts P, Stead LF:  
575 **Elucidating drivers of oral epithelial dysplasia formation and malignant transformation to**  
576 **cancer using RNAseq.** *Oncotarget; Vol 6, No 37* 2015.
- 577 30. Wang J, Duncan D, Shi Z, Zhang B: **WEB-based GENE SeT ANALYSIS Toolkit (WebGestalt):**  
578 **update 2013.** *Nucleic Acids Research* 2013, **41**:W77-W83.
- 579 31. Subramanian A, Tamayo P, Mootha VK, Mukherjee S, Ebert BL, Gillette MA, Paulovich A,  
580 Pomeroy SL, Golub TR, Lander ES, Mesirov JP: **Gene set enrichment analysis: A knowledge-**

- 581 **based approach for interpreting genome-wide expression profiles. *Proceedings of the*  
582 *National Academy of Sciences* 2005, **102**:15545.**
- 583 32. Picelli S, Faridani OR, Björklund ÅK, Winberg G, Sagasser S, Sandberg R: **Full-length RNA-**  
584 **seq from single cells using Smart-seq2.** *Nature Protocols* 2014, **9**:171.
- 585 33. Butler A, Hoffman P, Smibert P, Papalexi E, Satija R: **Integrating single-cell transcriptomic**  
586 **data across different conditions, technologies, and species.** *Nature Biotechnology* 2018,  
587 **36**:411.  
588
